# Supplementary material
Source: PubMed Central journal article supplement (PMC5335919)

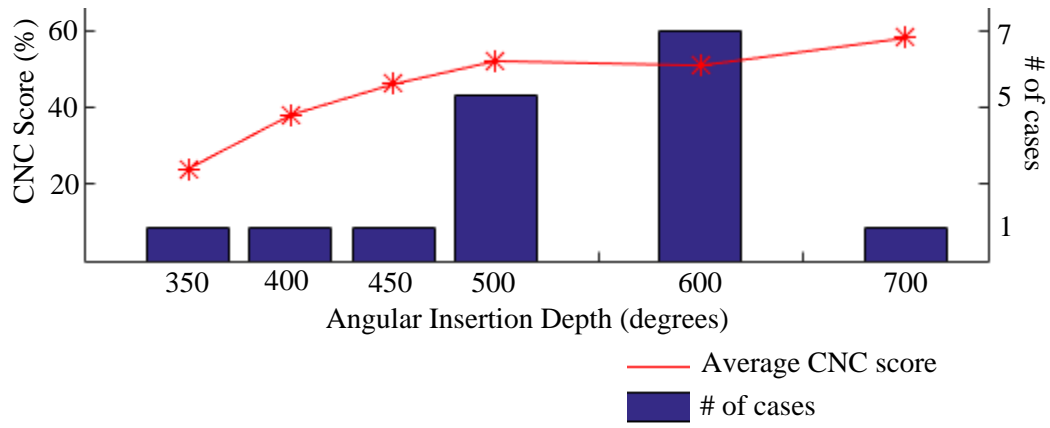

Supplement: NIHMS837159-supplement-Supplemental_Digital_Content_1.pdf [file NIHMS837159-supplement-Supplemental_Digital_Content_1.pdf]
